# Supplementary material for: Muskuloskeletale Beschwerden bei Friseur*innen
Source: Springer Nature journal article supplement (doi:10.1007/s40664-021-00445-7), 2021-09-29
Supplement: MOESM1 [file 19710392]

| **Tabelle 1.** Prävalenz von schweren MSB des Nackens, oberen und unteren Rückens und Ergebnisse der Chi²- und Mann-Whitney-U-Tests, stratifiziert nach soziodemografischen und arbeitsbezogenen Merkmalen. | | | | | | | | | | |
| --- | --- | --- | --- | --- | --- | --- | --- | --- | --- | --- |
| **Variable** |  | **Nacken** | | | **oberer Rücken** | | | **unterer Rücken** | | |
|  | ***n (%)*** | ***p*** | ***Cramers V/r*** | ***n (%)*** | ***p*** | ***Cramers V/r*** | ***n (%)*** | ***p*** | ***Cramers V/r*** |
| **Geschlecht** | weiblich | 205 (26,1) | <0,01 | 0,094** | 179 (23,1) | <0,01 | 0,092** | 201 (25,7) | <0,05 | 0,070* |
| männlich | 10 (12,2) |  |  | 8 (10,0) |  |  | 12 (15,2) |  |  |
| **Altera** | unter 25 Jahre | 17 (10,3) | <0,001 | 0,164*** | 25 (15,5) | <0,01 | 0,099** | 29 (17,9) | <0,01 | 0,110** |
| 25 bis unter 35 Jahre | 47 (23,0) |  |  | 40 (19,7) |  |  | 44 (21,4) |  |  |
| 35 bis unter 50 Jahre | 77 (28,5) |  |  | 60 (22,7) |  |  | 71 (26,7) |  |  |
| 50 Jahre und älter | 74 (32,5) |  |  | 62 (27,4) |  |  | 69 (30,5) |  |  |
| **BMIa** | Normalgewicht | 126 (25,0) | 0,586 |  | 116 (23,4) | 0,509 |  | 130 (25,9) | 0,737 |  |
| Übergewicht | 47 (21,5) |  |  | 42 (19,3) |  |  | 49 (22,7) |  |  |
| Adipositas | 28 (31,5) |  |  | 19 (21,8) |  |  | 25 (28,4) |  |  |
| **Beruflicher Ausbildungsstand1** | Auszubildende*r | 4 (5,1) | <0,001 | 0,149*** | 9 (11,5) | 0,074 |  | 8 (10,4) | <0,01 | 0,118** |
| Geselle*in | 115 (25,5) |  |  | 100 (22,4) |  |  | 109 (24,2) |  |  |
| Meister*in | 86 (28,1) |  |  | 69 (23,1) |  |  | 87 (29,0) |  |  |
| **Berufliche Stellung (selbstständig)** | ja | 137 (22,9) | 0,059 |  | 125 (21,2) | 0,254 |  | 138 (23,2) | 0,119 |  |
| nein | 71 (29,1) |  |  | 59 (24,8) |  |  | 68 (28,3) |  |  |
| **Berufsjahrea** | unter 10 Jahre | 31 (13,5) | <0,001 | 0,157*** | 33 (14,7) | <0,01 | 0,101** | 40 (17,7) | <0,01 | 0,095** |
| 10 bis unter 20 Jahre | 45 (26,0) |  |  | 42 (24,0) |  |  | 44 (25,0) |  |  |
| 20 bis unter 30 Jahre | 50 (31,4) |  |  | 37 (24,0) |  |  | 47 (30,1) |  |  |
| 30 bis unter 40 Jahre | 50 (28,7) |  |  | 43 (24,9) |  |  | 47 (27,0) |  |  |
| 40 Jahre und mehr | 38 (32,2) |  |  | 31 (27,0) |  |  | 32 (27,8) |  |  |
| **Wochenarbeitszeita** | 1 bis unter 20 Stunden | 28 (24,3) | 0,998 |  | 21 (18,6) | 0,266 |  | 23 (20,5) | 0,469 |  |
| 20 bis unter 38 Stunden | 75 (26,0) |  |  | 66 (22,9) |  |  | 77 (26,5) |  |  |
| 38 bis 40 Stunden | 54 (22,3) |  |  | 48 (20,4) |  |  | 55 (23,1) |  |  |
| 41 Stunden und mehr | 55 (26,8) |  |  | 50 (24,8) |  |  | 56 (27,6) |  |  |
| **Wochenarbeitszeit jemals wegen MSB reduziert** | ja | 56 (48,7) | <0,001 | 0,218*** | 52 (44,8) | <0,001 | 0,221*** | 54 (47,0) | <0,001 | 0,202*** |
| nein | 158 (21,0) |  |  | 134 (18,2) |  |  | 159 (21,4) |  |  |
| ***Anmerkungen.***a *Mann-Whitney-U-Test*;1 *Fälle ohne Ausbildung aus Analysen ausgeschlossen;* ns *nicht signifikant;* * *p <0,05;* ** *p <0,01;* *** *p <0,001; n variiert zwischen 801 und 868.* | | | | | | | | | | |

| **Tabelle 2.** Prävalenz von schweren MSB der Schultern, oberen und unteren Extremitäten und Ergebnisse der Chi²- und Mann-Whitney-U-Tests, stratifiziert nach soziodemografischen und arbeitsbezogenen Merkmalen. | | | | | | | | | | |
| --- | --- | --- | --- | --- | --- | --- | --- | --- | --- | --- |
| **Variable** |  | **Schultern** | | | **obere Extremitäten2** | | | **untere Extremitäten3** | | |
|  | ***n (%)*** | ***p*** | ***Cramers V/r*** | ***n (%)*** | ***p*** | ***Cramers V/r*** | ***n (%)*** | ***p*** | ***Cramers V/r*** |
| **Geschlecht** | weiblich | 186 (23,5) | 0,114 |  | 122 (15,8) | 0,600 |  | 126 (16,3) | 0,151 |  |
| männlich | 13 (15,9) |  |  | 11 (13,6) |  |  | 8 (10,1) |  |  |
| **Altera** | unter 25 Jahre | 22 (13,3) | <0,001 | 0,170*** | 17 (10,6) | <0,001 | 0,165*** | 19 (11,8) | <0,001 | 0,146*** |
| 25 bis unter 35 Jahre | 35 (16,9) |  |  | 18 (8,8) |  |  | 19 (9,3) |  |  |
| 35 bis unter 50 Jahre | 64 (24,0) |  |  | 42 (16,3) |  |  | 37 (14,2) |  |  |
| 50 Jahre und älter | 78 (33,6) |  |  | 56 (24,5) |  |  | 59 (26,2) |  |  |
| **BMIa** | Normalgewicht | 124 (24,6) | 0,805 |  | 73 (14,7) | 0,135 |  | 70 (14,1) | <0,01 | 0,090** |
| Übergewicht | 43 (19,5) |  |  | 34 (15,7) |  |  | 28 (12,8) |  |  |
| Adipositas | 22 (24,2) |  |  | 19 (21,1) |  |  | 28 (32,2) |  |  |
| **Beruflicher Ausbildungsstand1** | Auszubildende*r | 9 (11,3) | <0,05 | 0,100* | 6 (7,7) | 0,053 |  | 8 (10,5) | 0,409 |  |
| Geselle*in | 100 (22,2) |  |  | 64 (14,5) |  |  | 74 (16,5) |  |  |
| Meister*in | 81 (26,3) |  |  | 55 (18,3) |  |  | 48 (16,2) |  |  |
| **Berufliche Stellung (selbstständig)** | ja | 128 (21,3) | <0,05 | 0,068* | 84 (14,3) | 0,054 |  | 91 (15,4) | 0,827 |  |
| nein | 68 (27,6) |  |  | 47 (19,7) |  |  | 38 (16,0) |  |  |
| **Berufsjahrea** | unter 10 Jahre | 30 (13,0) | <0,001 | 0,164*** | 21 (9,3) | <0,001 | 0,161*** | 23 (10,2) | <0,001 | 0,132*** |
| 10 bis unter 20 Jahre | 35 (19,8) |  |  | 20 (11,6) |  |  | 24 (13,7) |  |  |
| 20 bis unter 30 Jahre | 47 (29,6) |  |  | 23 (15,2) |  |  | 23 (14,7) |  |  |
| 30 bis unter 40 Jahre | 47 (27,3) |  |  | 39 (22,4) |  |  | 34 (20,2) |  |  |
| 40 Jahre und mehr | 39 (32,5) |  |  | 28 (23,9) |  |  | 29 (25,2) |  |  |
| **Wochenarbeitszeita** | 1 bis unter 20 Stunden | 23 (20,2) | 0,630 |  | 15 (13,3) | 0,326 |  | 16 (14,0) | 0,926 |  |
| 20 bis unter 38 Stunden | 73 (25,0) |  |  | 44 (15,5) |  |  | 50 (17,4) |  |  |
| 38 bis 40 Stunden | 50 (20,6) |  |  | 33 (13,9) |  |  | 37 (15,8) |  |  |
| 41 Stunden und mehr | 50 (24,3) |  |  | 38 (18,8) |  |  | 29 (14,5) |  |  |
| **Wochenarbeitszeit jemals wegen MSB reduziert** | ja | 54 (46,6) | <0,001 | 0,223*** | 32 (29,1) | <0,001 | 0,145*** | 42 (36,2) | <0,001 | 0,225*** |
| nein | 144 (19,1) |  |  | 100 (13,5) |  |  | 91 (12,4) |  |  |
| ***Anmerkungen.***  a *Mann-Whitney-U-Test*;1 *Fälle ohne Ausbildung aus Analysen ausgeschlossen;* 2 *Ellenbogen, Handgelenke, Daumen, Finger;* 3 *Hüfte, Knie, Füße/Fußgelenke;* ns *nicht signifikant;* * *p <0,05;* ** *p <0,01;* *** *p <0,001; n variiert zwischen 800 und 872.* | | | | | | | | | | |

| **Tabelle 3.** Prävalenz der reduzierten wöchentlichen Arbeitszeit aufgrund von MSB und Ergebnisse der Chi²- und Mann-Whitney-U-Tests, stratifiziert nach soziodemografischen und arbeitsbezogenen Merkmalen. | | | | |
| --- | --- | --- | --- | --- |
| **Variable** |  | ***n (%)*** | ***p*** | ***Cramers V/r*** |
| **Geschlecht, n = 886** | weiblich | 113 (14,1) | 0,076 |  |
| männlich | 6 (7,1) |  |  |
| **Altera, n = 885** | unter 25 Jahre | 6 (3,6) | <0,001 | 0,243*** |
| 25 bis unter 35 Jahre | 12 (5,7) |  |  |
| 35 bis unter 50 Jahre | 46 (16,8) |  |  |
| 50 Jahre und älter | 55 (23,5) |  |  |
| **BMIa, n = 871** | Normalgewicht | 64 (12,4) | 0,086 |  |
| Übergewicht | 33 (14,7) |  |  |
| Adipositas | 17 (18,7) |  |  |
| **Beruflicher Ausbildungsstand1,  n = 852** | Auszubildender | 4 (4,9) | <0,001 | 0,141*** |
| Geselle | 52 (11,3) |  |  |
| Meister | 61 (19,7) |  |  |
| **Berufliche Stellung (selbstständig), n = 860** | ja | 55 (22,3) | <0,001 | 0,166*** |
| nein | 60 (9,8) |  |  |
| **Berufsjahrea,  n = 872** | unter 10 Jahre | 9 (3,8) | <0,001 | 0,230*** |
| 10 bis unter 20 Jahre | 16 (8,8) |  |  |
| 20 bis unter 30 Jahre | 28 (17,5) |  |  |
| 30 bis unter 40 Jahre | 32 (18,1) |  |  |
| 40 Jahre und mehr | 33 (27,5) |  |  |
| **Wochenarbeitszeita, n = 869** | 1 bis unter 20 Stunden | 21 (18,1) | 0,113 |  |
| 20 bis unter 38 Stunden | 46 (15,5) |  |  |
| 38 bis 40 Stunden | 20 (8,0) |  |  |
| 41 Stunden und mehr | 30 (14,4) |  |  |
| ***Anmerkungen.***a *Mann-Whitney-U-Test*; 1 *Fälle ohne Ausbildung aus Analysen ausgeschlossen;* ns *nicht signifikant;* * *p <0,05;* ** *p <0,01;* *** *p <0,001.* | | | | |
